# Supplementary material
Source: ML conference proceedings conference paper supplement (https://proceedings.neurips.cc/paper_files/paper/2023/hash/fb71332951af4ae27fbd457daadc5341-Abstract.html)
Supplement: Supplementary file 1 [file fb71332951af4ae27fbd457daadc5341-Supplemental-Conference.zip]

Archive with 3 entries (3 files):
- adaptive-experts.py
- adaptive-plot.py
- robust_streaming_experts_neurips_23_full.pdf
