# Supplementary material
Source: ML conference proceedings conference paper supplement (https://proceedings.neurips.cc/paper_files/paper/2023/hash/fb71332951af4ae27fbd457daadc5341-Abstract.html)
Supplement: Supplementary file 1 [file fb71332951af4ae27fbd457daadc5341-Supplemental-Conference.zip › adaptive-experts.py]

import math
import random
import time

N=100000
M=20
T=1000
R=0.35
#N=100
#M=2
#T=100
#R=0.1

#N experts, M mistakes by best expert, T times, R target regret
poolSize = math.ceil((N*M)/(T*R))
rounds = 20

errsDet = [0]*rounds
errsRand = [0]*rounds

start = time.time()

for r in range(rounds):

    #poolSize = N-1
    allErrsDet = [0]*N
    allErrsRand = [0]*N

    tooHighDet = False
    tooHighRand = False

    errDet = 0
    errRand = 0

    nextStart = -poolSize

    for t in range(T):
        sample = 0
        if not tooHighRand:
            sample = random.sample(range(0, N), poolSize)
            errRand += 1
        if not tooHighDet:
            nextStart = (nextStart + poolSize)%N
            errDet += 1
        for i in range(poolSize):
            if not tooHighDet:
                ind = (nextStart+i)%N
                allErrsDet[ind]+=1
            if not tooHighRand:
                allErrsRand[sample[i]]+=1
        if min(allErrsDet)>=M:
            tooHighDet = True
        if min(allErrsRand)>=M:
            tooHighRand = True

    errsDet[r]=errDet
    errsRand[r]=errRand

end = time.time()

print(errsDet, errsRand)
print(end - start)
